# Supplementary material
Source: ML conference proceedings conference paper supplement (https://www.ecva.net/papers/eccv_2022/papers_ECCV/html/136630375_ECCV_2022_paper.php)
Supplement: Supplementary file 1 [file 136630375-supp.zip]

Archive with 1 entries (1 files):
- ECCV_supplements.pdf
